# Supplementary material for: Interactions between the mRNA and Rps3/uS3 at the entry tunnel of the ribosomal small subunit are important for no-go decay
Source: PubMed Central journal article supplement (PMC6283612; doi:10.1371/journal.pgen.1007818), 2018-11-26
Supplement: pgen.1007818.s004.pdf [file pgen.1007818.s004.pdf]

**S1 Table: List of yeast strains used in this work**

| <u>Strain</u>                             | <u>Genotype</u>                                                       | <u>Source</u> |
|-------------------------------------------|-----------------------------------------------------------------------|---------------|
| BY4741 (matA)                             | <i>MATa</i> ( <i>his3Δ1 leu2Δ0 met15Δ0 ura3Δ0</i> )                   | Dharmacon     |
| DOM34Δ                                    | BY4741; dom34::KanMX                                                  | Dharmacon     |
| XRN1Δ                                     | BY4741; xrn1::KanMX                                                   | Dharmacon     |
| SKI2Δ                                     | BY4741; ski2::KanMX                                                   | Dharmacon     |
| matA; RPS3                                | BY4741; rps3-HIS3                                                     | This work     |
| DOM34Δ; RPS3                              | BY4741; dom34::KanMX; rps3-HIS3                                       | This work     |
| XRN1Δ; RPS3                               | BY4741; xrn1::KanMX; rps3-HIS3                                        | This work     |
| SKI2Δ; RPS3                               | BY4741; ski2::KanMX; rps3-HIS3                                        | This work     |
| matA; RPS3(R116A,R117A)                   | BY4741; rps3 (R116A, R117A)-HIS3                                      | This work     |
| DOM34Δ; RPS3(R116A,R117A)                 | BY4741; dom34::KanMX; rps3 (R116A, R117A)-HIS3                        | This work     |
| XRN1Δ; RPS3(R116A,R117A)                  | BY4741; xrn1::KanMX; rps3 (R116A, R117A)-HIS3                         | This work     |
| SKI2Δ; RPS3(R116A,R117A)                  | BY4741; ski2::KanMX; rps3 (R116A, R117A)-HIS3                         | This work     |
| SKI2Δ; RPS3(D154A)                        | BY4741; ski2::KanMX; rps3 (D154A)-HIS3                                | This work     |
| SKI2Δ; RPS3(K200N)                        | BY4741; ski2::KanMX; rps3 (K200N)-HIS3                                | This work     |
| SKI2Δ; RPS3(D154A,K200N)                  | BY4741; ski2::KanMX; rps3 (D154A, K200N)-HIS3                         | This work     |
| DOM34Δ; SKI2Δ; RPS3                       | BY4741; dom34::KanMX; ski2::KanMX; rps3-HIS3                          | This work     |
| DOM34Δ; SKI2Δ; RPS3(R116A,R117A)          | BY4741; dom34::KanMX; ski2::KanMX; rps3 (R116A, R117A)-HIS3           | This work     |
| matA; RPS3; ASC1                          | BY4741; rps3-HIS3; asc1-LEU2                                          | This work     |
| matA; RPS3(R116A,R117A); ASC1             | BY4741; rps3 (R116A, R117A)-HIS3; asc1-LEU2                           | This work     |
| matA; RPS3; ASC1(R38D,K40E)               | BY4741; rps3-HIS3; asc1 (R38D, K40E)-LEU2                             | This work     |
| matA; RPS3(R116A,R117A); ASC1(R38D,K40E)  | BY4741; rps3 (R116A, R117A)-HIS3; asc1 (R38D, K40E)-LEU2              | This work     |
| SKI2Δ; RPS3; ASC1                         | BY4741; ski2::KanMX; rps3-HIS3; asc1-LEU2                             | This work     |
| SKI2Δ; RPS3(R116A,R117A); ASC1            | BY4741; ski2::KanMX; rps3 (R116A, R117A)-HIS3; asc1-LEU2              | This work     |
| SKI2Δ; RPS3; ASC1(R38D,K40E)              | BY4741; ski2::KanMX; rps3-HIS3; asc1 (R38D, K40E)-LEU2                | This work     |
| SKI2Δ; RPS3(R116A,R117A); ASC1(R38D,K40E) | BY4741; ski2::KanMX; rps3 (R116A, R117A)-HIS3; asc1 (R38D, K40E)-LEU2 | This work     |
| SKI2Δ; RPS3; RPS2                         | BY4741; ski2::KanMX; rps3-HIS3; rps2-LEU2                             | This work     |

|                                       |                                                                 |           |
|---------------------------------------|-----------------------------------------------------------------|-----------|
| SKI2Δ; RPS3(R116A,R117A); RPS2        | BY4741; ski2::KanMX; rps3 (R116A, R117A)-HIS3; rps2-LEU2        | This work |
| SKI2Δ; RPS3; RPS2(E120A)              | BY4741; ski2::KanMX; rps3-HIS3; rps2 (E120A)-LEU2               | This work |
| SKI2Δ; RPS3(R116A,R117A); RPS2(E120A) | BY4741; ski2::KanMX; rps3(R116A, R117A)-HIS3; rps2 (E120A)-LEU2 | This work |
| matA; RPS3; SKI7Δ                     | BY4741; rps3-HIS3; ski7::LEU2                                   | This work |
| matA; RPS3(R116A,R117A); SKI7Δ        | BY4741; rps3 (R116A, R117A)-HIS3; ski7::LEU2                    | This work |
| SKI2Δ; RPS3; SKI7Δ                    | BY4741; ski2::KanMX; rps3-HIS3; ski7::LEU2                      | This work |
| SKI2Δ; RPS3(R116A,R117A); SKI7Δ       | BY4741; ski2::KanMX; rps3 (R116, R117A)-HIS3; ski7::LEU2        | This work |
| DOM34Δ; RPS3; SKI7Δ                   | BY4741; dom34::KanMX; rps3-HIS3; ski7::LEU2                     | This work |
| DOM34Δ; RPS3(R116A,R117A); SKI7Δ      | BY4741; dom34::KanMX; rps3 (R116A, R117A)-HIS3; ski7::LEU2      | This work |
