# Supplementary material for: Interactions between the mRNA and Rps3/uS3 at the entry tunnel of the ribosomal small subunit are important for no-go decay
Source: PubMed Central journal article supplement (PMC6283612; doi:10.1371/journal.pgen.1007818), 2018-11-26
Supplement: pgen.1007818.s005.pdf [file pgen.1007818.s005.pdf]

**S2 Table: DNA oligos used in this study.**

| <b>Oligo</b> | <b>Purpose</b>                               | <b>Sequence</b>                                                                                                      |
|--------------|----------------------------------------------|----------------------------------------------------------------------------------------------------------------------|
| PGK-HS-RT3   | HiSeq - amplify 5'fragments from RT reaction | AAT GAT ACG GCG ACC ACC GAG ATC TAC ACT CTT TCC CTA CAC GAC GCT CTT CCG<br>ATC TAT TGA TGG TGC CTA CAG               |
| HS-F2        | HiSeq                                        | CAA GCA GAA GAC GGC ATA CGA GAT ACT GAT GTG ACT GGA GTT CAG ACG TGT GCT<br>CTT CCG ATC TGG TAA GGC TTT GGA GAA CCC A |
| HS-F3        | HiSeq                                        | CAA GCA GAA GAC GGC ATA CGA GAT ATG CTG GTG ACT GGA GTT CAG ACG TGT GCT<br>CTT CCG ATC TGG TAA GGC TTT GGA GAA CCC A |
| HS-F4        | HiSeq                                        | CAA GCA GAA GAC GGC ATA CGA GAT ACG TCG GTG ACT GGA GTT CAG ACG TGT GCT<br>CTT CCG ATC TGG TAA GGC TTT GGA GAA CCC A |
| HS-F5        | HiSeq                                        | CAA GCA GAA GAC GGC ATA CGA GAT AGC TGC GTG ACT GGA GTT CAG ACG TGT GCT<br>CTT CCG ATC TGG TAA GGC TTT GGA GAA CCC A |
| HS-F6        | HiSeq                                        | CAA GCA GAA GAC GGC ATA CGA GAT ATC GTA GTG ACT GGA GTT CAG ACG TGT GCT<br>CTT CCG ATC TGG TAA GGC TTT GGA GAA CCC A |
| HS-F7        | HiSeq                                        | CAA GCA GAA GAC GGC ATA CGA GAT TGG TCA GTG ACT GGA GTT CAG ACG TGT GCT<br>CTT CCG ATC TGG TAA GGC TTT GGA GAA CCC A |
| HS-F8        | HiSeq                                        | CAA GCA GAA GAC GGC ATA CGA GAT CAC TGT GTG ACT GGA GTT CAG ACG TGT GCT<br>CTT CCG ATC TGG TAA GGC TTT GGA GAA CCC A |
| HS-F9        | HiSeq                                        | CAA GCA GAA GAC GGC ATA CGA GAT ATT GGC GTG ACT GGA GTT CAG ACG TGT GCT<br>CTT CCG ATC TGG TAA GGC TTT GGA GAA CCC A |
| HS-F10       | HiSeq                                        | CAA GCA GAA GAC GGC ATA CGA GAT GAT CTG GTG ACT GGA GTT CAG ACG TGT GCT<br>CTT CCG ATC TGG TAA GGC TTT GGA GAA CCC A |

|                 |                   |                                                                                                                      |
|-----------------|-------------------|----------------------------------------------------------------------------------------------------------------------|
| HS-F11          | HiSeq             | CAA GCA GAA GAC GGC ATA CGA GAT TCA AGT GTG ACT GGA GTT CAG ACG TGT GCT<br>CTT CCG ATC TGG TAA GGC TTT GGA GAA CCC A |
| 5PGK probe      | northern blotting | AAC TGG AGC CAA AGA GTA TTT TTC GTT TCT TTC ACC GTT TGG TCT ACC CAA GTG<br>AGA AGC                                   |
| oRP121 probe    | northern blotting | AAT TCC CCC CCC CCC CCC CCC CA                                                                                       |
| SCR1 probe      | northern blotting | GTC TAG CCG CGA GGA AGG                                                                                              |
| PGK-CGA12-F     | cloning           | CTAGA CGA T                                                                  |
| PGK-CGA12-R     | cloning           | CTAGA TCG T                                                                  |
| PGK-AAA12-F     | cloning           | CTAGA CGC AAA T                                                          |
| PGK-AAA12-R     | cloning           | CTAGA TTT GCG T                                                              |
| SKI7::Leu-2-F   | knockout cassette | CGA GGA GGT GGT CTT CGA AAC TTA CAG TAC CAC CTG ACG TTA ACT GTG GGA ATA<br>CTC AGG                                   |
| SKI7::Leu-2-F-1 | knockout cassette | GAT TGG AGG TAT AAA CCT AGA GAC CCT TCT ACA ATA CAC GTA CGA GGA GGT GGT<br>CTT CGA                                   |
| SKI7::Leu-2-R   | knockout cassette | TAA GTA TGA ATG CCT AGT ATA ATT TCT TAG TTG TAG GAT TGA CTT AAA CTC CAT<br>CAA ATG                                   |
| SKI7::Leu-2-R-1 | knockout cassette | CAA CTT ATT ACT ATT CAT TTT ATA TAT TAA ACA ATA AGT ATG AAT GCC TAG TAT AAT<br>TTC                                   |
| Rps3-F (BamHI)  | cloning           | ACT GAG TTC GGA TCC GTC GCT TTA ATC TCT AAG AA                                                                       |
| Rps3-R (XhoI)   | cloning           | CAA ATC TGG CTC GAG CTA AGC TTC AAC TGG TTC AGC TTG AGC T                                                            |
| Rps3-UTR-5'     | cloning           | GCT GAA CCA GTT GAA GCT TAG                                                                                          |
| Rps3-UTR-3'     | cloning           | CCT AGC GGA TCT GCC GGA GAA AGA TGA ACT GCT ACT CAC T                                                                |
| Rps3-UTR-His-5' | cloning           | AGT GAG TAG CAG TTC ATC TTT CTC CGG CAG ATC CGC TAG G                                                                |

|                   |                           |                                                                                    |
|-------------------|---------------------------|------------------------------------------------------------------------------------|
| Rps3-UTR-His-3'   | cloning                   | AAC TCA TTC ATA TCC GAG AAA TCG TCC TGT AAG CTG GAA TTC GAG CTC GTT TAA<br>ACT GGA |
| Rps3-UTR-His-3'-2 | cloning                   | TAC AGG CGG CGT ATA CAA GTG GTG AAA ACG ATA GCG AAC TCA TTC ATA TCC GAG<br>AAA TCG |
| R116117A-F        | site-directed mutagenesis | GTT GAA CGG TTT GGC TAT CGC TGC TGC TGC TTA CGG TGT CGT CAG                        |
| R116117A-R        | site-directed mutagenesis | CTG ACG ACA CCG TAA GCA GCA GCA GCG ATA GCC AAA CCG TTC AAC                        |
| Rps2-F (BamHI)    | cloning                   | ACTGAGTTCGGATCCATGTCTGCTCCAGAAGCTCA                                                |
| Rps2-R (XhoI)     | cloning                   | GCTAATGACCTCGAGCTCCACCTCCGGTTGAAAAG                                                |
| Rps2-E120A-F      | site-directed mutagenesis | GTATCAAGACCGCCAAGGCAGTTGCTGGTGCCATCAG                                              |
| Rps2-E120A-R      | site-directed mutagenesis | GTATCAAGACCGCCAAGGCAGTTGCTGGTGCCATCAG                                              |
| ASC1-F(XbaI)      | cloning                   | CAA TAT TTA CTC TAG ATG CAC CAT TCT ACG                                            |
| ASC1-R(BamHI)     | cloning                   | GAT CAA CTG GAT CCT TCA ATT GCA CAG TC                                             |
| ASC1-R38D-K40E-F  | site-directed mutagenesis | CCT ATT GTT GTC CGC TTC CGA CGA CGA GAC TTT GAT CTC CTG GAA G                      |
| ASC1-R38D-K40E-R  | site-directed mutagenesis | CTT CCA GGA GAT CAA AGT CTC GTC GTC GGA AGC GGA CAA CAA TAG G                      |
